# Supplementary material
Source: Elsevier journal article supplement (https://www.sciencedirect.com/science/article/pii/S0211699521002423)
Supplement: mmc1 [file S0211699521002423:mmc1.docx]

**Evidencia sobre la externalización de los servicios de diálisis: una revisión de alcance**

**Resumen**

**Introducción:** La enfermedad renal crónica representa un importante problema de salud, tanto por su elevada incidencia y prevalencia, como por su importante morbimortalidad y coste socioeconómico. **Objetivo:** Comparar la efectividad y consecuencias económicas de la diálisis concertada frente a la diálisis hospitalaria. **Metodología**: Revisión de alcance, para lo cual se consultaron diferentes bases de datos, mediante términos controlados y libres. Se incluyeron aquellos artículos que comparasen la diálisis concertada frente a la hospitalaria en términos de efectividad. Igualmente, se incluyeron aquellas publicaciones que comparasen, en el ámbito español, el coste entre ambas modalidades de prestación de servicios y las tarifas de precios públicos de las diferentes Comunidades Autónomas. **Resultados:** En esta revisión se incluyeron 11 artículos: 8 sobre comparación de la efectividad, todos ellos en EEUU y 3 sobre costes. Se observó una mayor tasa de hospitalización en aquellos centros concertados, pero no se observaron diferencias en mortalidad. Además, una mayor competencia entre proveedores se asoció a menores tasas de hospitalización. Los estudios de costes revisados muestran que la hemodiálisis hospitalaria es más costosa que en centros concertados, debido a los costes de estructura. Los datos de las tarifas públicas de las diferentes Comunidades Autónomas muestran una amplia heterogeneidad en el pago de los conciertos. **Conclusiones:** la coexistencia en España de centros públicos y concertados, la variabilidad en la prestación y costes de las técnicas de diálisis y la escasa evidencia sobre la efectividad de la externalización del tratamiento ponen de manifiesto la necesidad de seguir potenciando estrategias que redunden en una mejora de la atención a la Enfermedad Renal Crónica.

**Palabras clave:** Diálisis; Servicios Externos; síntesis evidencia; efectividad; costes

**Evidence on Outsourcing Dialysis Services: A Scoping Review**

**Abstract**

**Introduction**: Chronic kidney disease represents an important health problem, due to its high incidence and prevalence, as well as its significant morbidity and mortality and socioeconomic cost. **Aims**: compare the effectiveness and economic consequences of outsourcing versus hospital dialysis. **Method**: A scoping review, for which different databases were consulted, using controlled and free terms. Those articles that compared concerted versus in hospital dialysis in terms of effectiveness were included. Likewise, those publications that compared, in the Spanish field, the cost between both modes of service provision and the public price rates of the different Autonomous Communities were included. **Results**: 11 articles were included in this review: 8 on comparison of effectiveness, all of them in the USA, and 3 on costs. A higher rate of hospitalization was observed in subsidized centers, but no differences in mortality were observed. Additionally, greater competition among providers was associated with lower hospitalization rates. The cost studies reviewed show that hospital hemodialysis is more expensive than in subsidized centers, due to the structural costs. The data of the public rates of the different Autonomous Communities show a wide heterogeneity in the payment of the concerts. **Conclusions**: the coexistence in Spain of public and subsidized centers, the variability in the provision and costs of dialysis techniques, and the low of evidence on the effectiveness of outsourcing treatment show all the need to continue promoting strategies that result in improvement in the care for Chronic Kidney Disease.

**Introducción**

La enfermedad renal crónica (ERC) representa un importante problema de salud, tanto por su elevada incidencia y prevalencia, como por su importante morbimortalidad y coste socioeconómico1. En nuestro país, el Tratamiento Sustitutivo Renal (TSR) proporciona soporte terapéutico a 64.292 pacientes, según los datos del año 2019, de los que un 54,7% eran pacientes con un trasplante funcionante, un 4,9% está en tratamiento con Diálisis Peritoneal (DP), y un 40,3% en Hemodiálisis (HD)2.

Los pacientes no trasplantados optan a diversas alternativas de TSR: tratamiento conservador o diálisis, en sus diferentes modalidades y ámbitos. La elección de la diálisis en domicilio, en el ámbito intra o extra-hospitalario (en centros satélite o periféricos) o los centros concertados viene determinada por diversos factores: estructurales y de alineación de incentivos, sociodemográficos, del paciente (comorbilidad, autonomía, etc.), profesionales, organizativos y de capacidad del servicio, o la propia distancia al centro sanitario3,4.

En la literatura se describe que existe cierta heterogeneidad de la calidad de la atención de los centros de dialisis5. Dos informes de las agencias de evaluación de tecnologías sanitarias de Canadá (CADTH)6 y Noruega (HPSR)7 no encontraron diferencias de efectividad en términos de hospitalizaciones (número y duración) y mortalidad entre la HD ofrecida en los centros concertados, centros hospitalarios o en centros periféricos (público y privados). En España, la Sociedad Española de Nefrología (SEN) publicó la Guía de Centro de Diálisis en el año 20068 y 20119, que recoge temas básicos para garantizar la calidad de tratamiento en centros extrahospitalarios, además de abordar aspectos de equidad y buenas prácticas asistenciales. En el año 2012, el Grupo de Trabajo de Gestión de la Calidad de la Sociedad Española de Nefrología desarrolló una estructura de ponderación de resultados de los centros de HD que permitiera crear un indicador adecuado para establecer comparaciones o benchmarking entre centros10. Poco después, el mismo grupo publicó un estudio que desarrolló una metodología que estimara el valor de la atención médica, generada para los pacientes y la sociedad, proporcionada en los centros de HD, de distinta tipología, de acuerdo a un conjunto de resultados11.

Nuestro modelo de TSR se basa fundamentalmente en HD y trasplante renal, con un dispositivo de provisión de la diálisis en el que la colaboración público-privada tiene un elevado peso. En la actualidad, prestan servicio alrededor de 357 centros12 y un gran número de pacientes pertenecientes al sistema público de salud reciben HD en centros extrahospitalarios, mediante conciertos con las diferentes delegaciones de salud.

La primera experiencia española de diálisis en centro concertado (contratos entre el centro y la Administración pública), se remonta al año 1975 en Madrid (Clínica Dialcentro), con un precio de 51-54€ (8.500-9.000 pesetas) por sesión, en el que se incluían los siguientes conceptos: medicamentos, dieta y la atención a los problemas médico-quirúrgicos interrecurrentes derivados de la insuficiencia renal y su tratamiento, incluyendo la realización de la fístula arteriovenosa13.

Teniendo en cuenta el elevado impacto económico y social14, se hace necesario recopilar la evidencia disponible para comparar la efectividad y consecuencias económicas de la diálisis concertada frente a la diálisis hospitalaria. Todo ello podría servir para orientar la toma a gestores y decisores sanitarios antes las distintas opciones de provisión del TSR.

**Metodología**

Se realizó una revisión de alcance15, siguiendo las indicaciones de la Organización Mundial de la Salud16 y siguiendo la guía propuesta para Scoping reviews17. A diferencia de las revisiones sistemáticas, las revisiones de alcance son exploratorias y, por lo general, abordan una pregunta amplia. Para ello, se consultaron, mediante términos libres y controlados, las siguientes bases de datos: PubMed, Embase, Web of Science (WOS), Cumulative Index to Nursing & Allied Health Literature (Cinahl), Scopus y The Cochrane Library. Esta búsqueda se complementó con una exploración de los siguientes recursos: Google Scholar y la Red de Agencias de Evaluación de Tecnología de Salud (<https://redets.mscbs.gob.es/>). Se examinaron las referencias incluidas en los artículos identificados y se consultó vía email con personas expertas sobre artículos y publicaciones clave sobre el tema a estudio (Anexo 1). Además, se revisaron los Boletines Oficiales de las diferentes Comunidades Autónomas españolas y la Mutualidad de funcionarios (MUFACE) para extraer las tarifas públicas vigentes. La estrategia de búsqueda adoptada para las diferentes bases de datos fue validada por una bibliotecaria especializada en salud pública.

(("contract services"[MeSH Terms] OR "outsourcing agreement*"[Text Word] OR "contract service*"[Text Word] OR "reimbursement*"[Text Word] OR "Insurance, Health, Reimbursement"[Mesh]) AND ("hemodialysis"[Text Word] OR "hemodialyses"[Text Word] OR "Renal Dialysis"[MeSH Terms] OR "Dialysis"[MeSH Terms] OR "Dialysis"[Text Word]))

Criterios de inclusión y exclusión: se incluyeron todos los artículos que realizasen una comparación de la diálisis concertada, frente a la prestación de servicios por parte de la no concertada, en términos de resultados de efectividad, es decir, los beneficios obtenidos mediante la aplicación de un tecnología sanitaria en términos de resultados en salud (mortalidad, morbilidad, reingresos hospitalarios, etc.); las comparativas en términos de costes se limitaron a aquellos estudios realizados y publicados en España. Se excluyeron aquellas referencias a estudios en las que no se realizasen comparación entre los tipos de centros y aquellos publicados en idioma diferente al inglés o español; la búsqueda se limitó a un periodo de 10 años.

Los resultados de la búsqueda bibliográfica se almacenaron en una biblioteca de Rayyan QCRI, el proceso de cribado fue realizado por pares (AOL y MdAGV) y las discrepancias resueltas por un tercer investigador (ACM). En primer lugar, por título y resumen (primera selección); posteriormente, se revisaron los artículos a texto completo.

**Resultados**

**Resultados del proceso de búsqueda**

La búsqueda identificó un total de 720 referencias (PubMed: 447, Embase: 245, Scopus: 22, Web of Science: 1 y Cinahl: 5). Tras la lectura de títulos y resúmenes, se seleccionó un total de 103 referencias para el siguiente paso de evaluación de texto completo a fin de garantizar que los artículos cumplían con todos los criterios de elegibilidad. Finalmente, tras identificar un artículo por referencias cruzadas, en esta revisión se incluyeron 11 artículos: 8 sobre comparación de la efectividad y 3 sobre coste (Figura 1).

**Efectividad comparada.**

Todos los estudios incluidos sobre efectividad han sido realizados en los Estados Unidos. Tres artículos compararon la efectividad de las organizaciones según su lucratividad, e incluyeron pacientes de la cohorte del registro renal de Estados Unidos de Medicare que recibieron diálisis en los años 200318, 2005-200819 y 201020. El número de pacientes fue de 170.13018, 150.64219 y 366,01120, respectivamente, una vez aplicados criterios de inclusión distintos; de ellos, un 9% recibía asistencia en centros no lucrativos. Los modelos multivariantes mostraron que los pacientes tratados en centros con ánimo de lucro mostraron una mayor tasa relativa de hospitalización, en concreto, un 15% (IC95%: 13%-18%; p<0,001)19 (principales causas: fallo cardíaco (37%) y la sobrecarga de volumen (15%)) y un 17,5% más de días ingresados en relación con los tratados en centros no lucrativos (error estándar 4,8; p<0,001)18. Además, Brunelli (2014)20 comparó tasas de hospitalización y mortalidad, incluyendo 366.011 y 34.029 pacientes en centros con y sin ánimo de lucro, respectivamente; no encontró diferencias significativas ni en mortalidad (p=0,64), ni en hospitalizaciones (p=0,69).

Por otro lado, se han encontrado cuatro artículos que comparaban los resultados en salud de los pacientes en función de si recibían atención en centros dependientes de la asociación de veteranos (VA) o en servicios externalizados. Así, se ha podido concluir que los pacientes atendidos en centros de la VA mostraron una mayor probabilidad de recibir atención nefrológica previa a la diálisis y disponer de una fístula arteriovenosa, aunque presentaban un mayor ingreso hospitalario y con mayor duración y menor acceso al trasplante de riñón, en relación a los pacientes atendidos en centros externalizados21–24.

Erickson (2018)25 evaluó en Estados Unidos la asociación entre la competencia en los mercados de diálisis y niveles de hospitalización y mortalidad. La competencia se midió mediante el índice Hirschman-Herfindahl (IHH), que oscila entre 0 y 1, donde una menor puntuación representa una mayor concentración de proveedores y por tanto mayor competencia. Se analizó una muestra de 632.734 pacientes procedentes de 3.379 centros de diálisis entre 2001 y 2011, siendo el índice IHH medio de 0,48. Tras ajustar por diferentes variables, se encontró que una reducción de 0,2 unidades en IHH se asoció a una disminución significativa en las hospitalizaciones 2,9 por 100 paciente-año, es decir, un incremento de la competencia entre proveedores conlleva beneficios para los pacientes. Competencia que, sin embargo, no se asoció con la mortalidad (tabla 1).

**Consecuencias económicas de la intervención**

Un informe de la Agencia de Evaluación de Tecnologías Sanitaria de Andalucía analizó la diferencia en costes entre las modalidades de hemodiálisis (HD) hospitalaria (HDH) (n=256 pacientes) y la concertada (HDC) (n=226). El coste total anual, por paciente y año, ascendió a 45.395,40€ en HDH frente a 38.815,77€ en HDC. Esta diferencia se explica principalmente por la estructura mucho más compleja existente en el hospital respecto a los centros donde se realiza la diálisis concertada, y que supone un incremento, sobre los costes directos de 6.718,52€ y 2.573,03€ en cada una de las modalidades. Costes directos, por su parte, muy similares en la HD hospitalaria y concertada, con 38.676,88€ y 36.062,74€ respectivamente3.

Un estudio de costes multicéntrico, dos de titularidad pública y cuatro concertados, obtuvo un coste medio de 40.136€; oscilando entre 33.130€ y 45.370€ en el caso de los centros concertados, y entre 46.254€ y 44.486€ para los centros públicos26. Se encontró una distribución similar entre los tipos de centros salvo en gasto en personal que era del 37,3% del total en los públicos y del 27,7% del total en los concertados. Por el contrario, otros gastos (transporte, gestión o mantenimiento) fue mayor en los centros concertados con un 24,4% frente al 17,1% de aquellos de titularidad pública.

En el estudio de Conde-Olasagasti (2017)27 se estimó el coste del programa de la diálisis en Toledo para los años 2012 y 2013. El coste total del tratamiento fue de 15.778.360€, del que un 40,1% correspondía al tratamiento de diálisis, un 21,2% a carga hospitalaria (cirugía mayor ambulatoria, consultas externas y visitas a urgencias), un 20,3% a farmacia, un 10,1% a transporte y un 7,5% en concepto de apoyo (sesiones de HD no programadas, entrenamiento en DP o atención a imprevistos en el hospital de día). Así, el coste el coste por paciente y año de la HDH fue de 53.289€ frente a los 44.971€ de la HDC. La comparativa de los diferentes componentes de coste permite observar que la principal diferencia de costes entre una y otra modalidad está en lo que se denomina carga hospitalaria, o gastos derivados de la asistencia médica directa (HDH 9.599€ vs. HDC 6.721€), seguido del coste de la diálisis (HDH 27.289€ vs. HDC 24.653€). La parte de coste que el transporte, la farmacia o el apoyo supone en el total de coste de cada modalidad no presentó diferencias importantes entre la HD hospitalaria o concertada (tabla 1).

**Precios públicos de las sesiones de hemodiálisis en España**

En la tabla 2 se muestran las tarifas públicas de los servicios de diálisis de las diferentes Comunidades Autónomas28–46, observándose un amplio margen temporal en las fechas de publicación de las tarifas entre junio 2011, en Castilla y León, y marzo del 2019, en Murcia. El precio público osciló entre los 393,42€ por sesión de hemodiálisis de La Rioja y 132,5€ de la sesión de Hemodiálisis en Andalucía (año 2015). Además de la variabilidad entre las tarifas de las diferentes regiones, una vez actualizados los importes al 2020 mediante el Índice de Precios al Consumo (IPC), se observa una diversidad notable en la denominación del concepto y tipo de diálisis, con un amplio rango de opciones terapéuticas que van desde la “sesión de HD” del País Vasco o Castilla y León, al detalle de cinco diferentes tipos de HD que publica Aragón.

**Discusión**

En un intento de obtener evidencias de un modo rápido y pragmático, se decidió utilizar la revisión de alcance (scoping review) ya que permite incluir artículos con diferentes diseños y medidas de resultado. La evidencia disponible obtenida de dicha revisión pone de manifiesto que en España la HD hospitalaria tiene un mayor coste respecto a la diálisis concertada y que en EEUU presenta una menor tasa de hospitalizaciones, no encontrándose diferencias significativas en la mortalidad.

Por otra parte, los escasos resultados sobre efectividad, medidos por los mencionados indicadores, deben ser tomados con cautela debido a la gran heterogeneidad de resultados y metodologías, debiendo destacarse además que sean obtenidos en un marco asistencial tan distinto del español como es el de EEUU, en el que impera la modificación de la práctica asistencial de los centros con ánimo de lucro para ajustarse a los contratos y/o obtener en máximo beneficio económico47–49. El hecho de que la totalidad de los estudios sobre efectividad comparada proceden de dicho país, dificulta la extrapolación de los resultados a nuestro medio.

Un hallazgo llamativo es que, teniendo en cuenta la trascendencia económica y social, y el aumento esperado de pacientes en diálisis, haya tan escaso número de publicaciones sobre la evaluación comparativa de la diálisis concertada. Ello dificulta ofrecer una base de información consistente y útil para la toma de decisiones en niveles de la meso y macro gestión.

***Otras informaciones y consideraciones***

Cabe destacar que se han encontrado dos revisiones sistemáticas que evaluaban la calidad de la asistencia sanitaria de multitud de servicios de centros dependientes de los VA. Estas dos revisiones concluyen que, en general, la atención sanitaria en los centros dependientes de la VA (Ej., Medicare, Medicaid) es buena o mejor que aquella atención proporcionada por los centros no dependientes de la VA o externalizados50,51.

En términos de seguridad en la atención, no se encontró ningún artículo que evaluara diferencias en distintos ámbitos de la prestación de la diálisis. En un estudio de 201752, realizado en un centro hospitalario español, se revisaron todas las sesiones de HD en 2 meses (2.149 en la unidad hospitalaria y 2.125 en el centro periférico) detectándose un 11,8% de eventos adversos (EA) en la unidad hospitalaria (un 12,9% de alta severidad) frente a un 9,2% en el centro periférico (un 1% de alta severidad). Los EA más frecuentes fueron la hipotensión, en ambos casos, seguidos de coagulación del circuito extracorpóreo y problemas de la FAV (unidad hospitalaria) y problemas relacionados con la punción de la FAV y coagulación del circuito extracorpóreo (en centro periférico).

Roderick et al. (2005)6 preguntó al personal de enfermería la incidencia de EA observada en las últimas seis semanas a 368 pacientes en HDC. Se halló un 37,5% de pacientes sin evento adverso importante, y de los 551 eventos adversos identificados, los más frecuentes fueron: hipotensión (48,8%), otros (32,1%) y problemas de acceso (15,3%). Estos resultados están en consonancia con el estudio de Arenas (2017)53 que encontró una proporción de eventos adversos en una unidad de HDC del 25,8%, siendo los más frecuentes la hipertensión (42,7%) y la hipotensión (27,5%).

Balhara (2012)54 realizó una encuesta a 906 nefrólogos de EEUU sobre el tiempo que dedicaban a educar a sus pacientes en estadio 4 de la ERC. Estimado en 20 minutos el tiempo ideal dedicado a la educación del paciente sobre el trasplante renal, uno de los resultados halló que solo el 43% de los profesionales afirmaban invertir ese tiempo. Además, se encontró que aquellos centros con ánimo de lucro mostraban estadísticamente un menor tiempo de dedicación a la educación (RR=0,89), counseling (RR=0,58), discusión sobre el trasplante (RR=0,58), implicación de los familiares (RR=0,57), frente a aquellos sin ánimo de lucro. Este resultado tiene, especial relevancia ya que la formación de los pacientes es un elemento clave para la autonomía de los pacientes y el autocuidado55 e incide directamente en los resultados de las técnicas y la satisfacción del paciente.

Relacionado con la satisfacción de los pacientes respecto a la atención recibida, se hallaron dos trabajos6,56. En ambos se encontró una mayor satisfacción de los pacientes en HD en centros concertados, siendo significativamente mayor en aquellas dimensiones relacionadas con la hostelería, el aspecto del centro y la información recibida por el personal sanitario.

La equidad y la continuidad asistencial se muestran como elementos clave para obtener los máximos resultados en salud de los pacientes en diálisis, siendo fundamental la coordinación entre los centros concertados y sus hospitales de referencia, que permitan homogeneizar criterios de actuación, cartera de servicios o técnicas, procedimientos, etc8.

En España, aún no se disponen de evaluaciones sistemáticas e independientes de las distintas formas de gestión, que permitan orientar las estrategias de organización y gestión futuras57. Destacar que el fomento de la competencia entre centros (con independencia de la forma jurídica de gestión) podría ofrecer mejoras25; competencia que no puede surgir de manera espontánea, dadas las características de cuasimonopolio que poseen los centros sanitarios en sus zonas de influencia, sino que debe ser generada en la licitación de los servicios (en el caso de la gestión privada) y por la comparación de resultados de eficiencia y calidad asistencial en el funcionamiento de los centros57. Así, los resultados en salud de los pacientes en diálisis no deberían estar condicionada por la titularidad (pública o privada) de los centros sanitarios.

La gran variabilidad entre las tarifas de las Comunidades Autónomas podría explicarse por las diferencias en los conceptos incluidos o diferentes metodologías para su cálculo, aunque también porque no estén reflejando los costes reales del tratamiento58. Un estudio realizado en Galicia concluyó que los conciertos de HD generaban un valor añadido (crecimiento económico y puestos trabajo) para el área sanitaria muy superior a los conciertos de DP59. Este resultado pone de manifiesto la necesidad de realizar una evaluación más exhaustiva y que incluya diferentes dimensiones y perspectivas, siendo el Análisis de Decisión Multicriterio una metodología novedosa que permite realizar la evaluación con una perspectiva más holística y transparente.

El tratamiento de la enfermedad renal tiene un elevado impacto en los sistemas sanitarios; así, el porcentaje del gasto sanitario osciló entre el 1,3% y 3% del gasto sanitario total, siendo mayor en los países con menores ingresos, representando éstos pacientes tan solo el 0,02-0,03% de la población general1,60. En 20 años se estima que un tercio de la población tendrá ≥65 años, lo que podrá verse traducido en un aumento de la prevalencia de pacientes en TRS del 41% en las próximas 2 décadas61. Todo ello pone de manifiesto la necesidad de utilización de estrategias que logren disminuir la carga económica de la ERC, mediante programas de prevención de la progresión de la enfermedad, junto a la promoción de la DP62. Así, la coexistencia en España de centros públicos y concertados, la variabilidad en la prestación de las técnicas de diálisis y la escasa evidencia sobre si la externalización del TSR supone una forma adecuada de reducir los costes del tratamiento, ponen de manifiesto la necesidad de dedicar esfuerzos y medios a la investigación comparativa de resultados para la aplicación de estrategias que redunden en una mejora de la atención a la Enfermedad Renal Crónica, dentro de las Estrategias de las Enfermedades Crónicas63–65.

**Bibliografía**

1. van der Tol A, Lameire N, Morton RL, Van Biesen W, Vanholder R. An International Analysis of Dialysis Services Reimbursement. Clin J Am Soc Nephrol. 2019;14(1):84–93.

2. Sociedad Española de Nefrología y la Organización Nacional de Trasplantes. Informe de Diálisis y Trasplante 2019. Registro Español de Enfermos Renales [Internet]. Available from: https://senefro.org/contents/webstructure/INFORME_REER_SEN_2020_WEB_SEN.pdf

3. Márquez S, Caro A, Adam D, Olry-de-Labry-Lima A, Navarro J, García L. Eficiencia de la diálisis peritoneal frente a hemodiálisis para el tratamiento de la insuficiencia renal. Informes de evaluación de tecnologías sanitarias AETSA. 2013.

4. Palanca Sánchez I, Conde Olasagasti J, Elola Somoza J, Bernal Sobrino JL, Paniagua Caparrós JL. Unidad de depuración extrarrenal: estándares y recomendaciones. Ministerio de Sanidad, editor. Madrid: Ministerio de Sanidad, Política Social e Igualdad. Madrid; 2011.

5. Fink JC, Zhan M, Blahut SA, Soucie M, McClellan WM. Measuring the efficacy of a quality improvement program in dialysis adequacy with changes in center effects. J Am Soc Nephrol. 2002;13(9):2338–44.

6. Roderick P, Nicholson T, Armitage A, Mehta R, Mullee M, Gerard K, et al. An evaluation of the costs, effectiveness and quality of renal replacement therapy provision in renal satellite units in England and Wales. Health Technol Assess. 2005;9(24):1–178.

7. Pike E, Hamidi V, Ringerike T, Wisløff T, Desser A, Harboe I, et al. Health Technology Assessment of the Different Dialysis Modalities in Norway. 2013.

8. Guías SEN. Guías de centros de hemodiálisis [Internet]. Nefrología. 2006. Available from: https://www.senefro.org/modules/webstructure/files/guiacentroshd130606_copy1.pdf?check_idfile=2402

9. Berdud I, Arenas MD, Bernat A, Ramos R, Blanco A. Anexo a la Guía de Centros de Diálisis: Recomendaciones sobre la relación entre los centros de hemodiálisis extrahospitalarios y sus hospitales de referencia: Opinión del Grupo de Diálisis Extrahospitalaria. Nefrología. 2011;31(6):664–9.

10. Parra E, Arenas MD, Alonso M, Martínez MF, Gamen Á, Balda S, et al. Ponderación de resultados para la evaluación global de centros de hemodiálisis. Nefrología. 2012;32(5):659–63.

11. Parra E, Arenas MD, Alonso M, Martínez MF, Gamen Á, Aguarón J, et al. Assessing value-based health care delivery for haemodialysis. J Eval Clin Pract. 2017;23(3):477–85.

12. Federación Nacional de Asociaciones para la lucha contra las enfermedades del Riñón. Centros de diálisis [Internet]. [cited 2021 Apr 23]. Available from: https://alcer.org/centro-de-dialisis/

13. Largo F. Oferta pública y privada en el tratamiento sustitutivo de la IRC en España. Nefrologia. 1994;14:36–41.

14. Villa G, Fernandez-Ortiz L, Cuervo J, Rebollo P, Selgas R, Gonzalez T, et al. Cost-effectiveness analysis of the Spanish renal replacement therapy program. Perit Dial Int. 2012;32(2):192–9.

15. Tricco AC, Antony J, Zarin W, Strifler L, Ghassemi M, Ivory J, et al. A scoping review of rapid review methods. BMC Med. 2015;13(1):224.

16. Tricco AC, Langlois E V, Straus SE. Rapid reviews to strengthen health policy and systems: a practical guide. World Health Organization Geneva; 2017.

17. Tricco AC, Lillie E, Zarin W, O’Brien KK, Colquhoun H, Levac D, et al. PRISMA Extension for Scoping Reviews (PRISMA-ScR): Checklist and Explanation. Ann Intern Med. 2018;169(7):467–73.

18. Lee DKK, Chertow GM, Zenios SA. Reexploring differences among for-profit and nonprofit dialysis providers. Health Serv Res. 2010;45(3):633–46.

19. Dalrymple LS, Johansen KL, Romano PS, Chertow GM, Mu Y, Ishida JH, et al. Comparison of hospitalization rates among for-profit and nonprofit dialysis facilities. Clin J Am Soc Nephrol. 2014;9(1):73–81.

20. Brunelli SM, Wilson S, Krishnan M, Nissenson AR. Confounders of mortality and hospitalization rate calculations for profit and nonprofit dialysis facilities: Analytic augmentation. BMC Nephrol. 2014;15(1):1–8.

21. Fischer MJ, Stroupe KT, Kaufman JS, O’Hare AM, Browning MM, Huo Z, et al. Predialysis nephrology care among older veterans using Department of Veterans Affairs or Medicare-covered services. Am J Manag Care. 2010;16(2):e57-66.

22. Hurst FP, Abbott KC, Raj D, Krishnan M, Palant CE, Agodoa LY, et al. Arteriovenous fistulas among incident hemodialysis patients in Department of Defense and Veterans Affairs facilities. J Am Soc Nephrol. 2010;21(9):1571–7.

23. Parikh DS, Inrig JK, Kipp A, Szczech LA, McClellan W, Patel UD. Veterans more likely to start hemodialysis with an arteriovenous fistula. Semin Dial. 2011;24(5):570–5.

24. Wang V, Maciejewski ML, Patel UD, Stechuchak KM, Hynes DM, Weinberger M. Comparison of outcomes for veterans receiving dialysis care from VA and non-VA providers. BMC Health Serv Res. 2013;13:26.

25. Erickson KF, Zheng Y, Ho V, Winkelmayer WC, Bhattacharya J, Chertow GM. Market Competition and Health Outcomes in Hemodialysis. Health Serv Res. 2018;53(5):3680–703.

26. Parra Moncasi E, Arenas Jiménez MD, Alonso M, Martínez MF, Gámen Pardo A, Rebollo P, et al. Multicentre study of haemodialysis costs. Nefrologia. 2011;31(3):299–307.

27. Olasagasti JLC, Diaz JEG, Benitez PC, Ruiz MÁM, Partido MPP, Alia IM, et al. Cost analysis of integrated renal replacement therapy program in the province of Toledo (2012–2013). Nefrología. 2017;37(3):285–92.

28. Resolución de 19 de julio de 2013, del Instituto Nacional de Gestión Sanitaria, sobre revisión de precios a aplicar por los centros sanitarios del Instituto Nacional de Gestión Sanitaria en Ceuta y Melilla, por las asistencias. [Internet]. 2013 [cited 2021 Jan 17]. Available from: http://www.boe.es

29. Resolución del director general del Servicio de Salud de las Islas Baleares por la que se modifica la Orden de la consejera de Salud y Consumo de 22 de diciembre de 2006 por la que se establecen los precios públicos a aplicar por los centros sanitarios de [Internet]. 2018 [cited 2021 Jan 17]. Available from: http://www.caib.es/eboibfront/

30. Resolució SLT/353/2013, de 13 de febrer, sobre la revisió de preus públics corresponents als serveis sanitaris que presta l’Institut Català de la Salut [Internet]. Dogc. 2013 [cited 2021 Jan 17]. p. 1–127. Available from: https://dogc.gencat.cat/es/inici/

31. Ley 20/2017, de 28 de diciembre, de tasas [Internet]. 2020 [cited 2021 Jan 17]. Available from: https://www.boe.es/

32. RESOLUCIÓN de 24 de enero de 2019, de la Vicepresidenta y Consejera, por la que se publican las tarifas actualizadas de las tasas y precios públicos de la Comunidad Autónoma de Extremadura en virtud de lo dispuesto en la Ley de presupuestos generales de l [Internet]. 2019 [cited 2021 Jan 17]. Available from: http://doe.gobex.es/

33. Decreto 56/2014, do 30 de abril, polo que se establecen as tarifas dos servizos sanitarios prestados nos centros dependentes do Servizo Galego de Saúde e nas fundacións públicas sanitarias. [Internet]. 2014 [cited 2021 Jan 17]. Available from: https://www.xunta.gal/diario-oficial-galicia/

34. Precios públicos por servicios sanitarios prestados a particulares en los centros del Servicio Riojano de Salud [Internet]. 2014 [cited 2021 Jan 17]. p. 24923–55. Available from: https://web.larioja.org/bor-portada

35. Orden por la que se fijan los precios públicos por la prestación de los servicios y actividades de naturaleza sanitaria de la red de centros de la Comunidad de Madrid. [Internet]. 2015 [cited 2021 Jan 17]. Available from: http://www.madrid.org/ICMdownload/NOUDM.pdf

36. Orden de 22 de febrero de 2019 de la Consejería de Hacienda, por la que se publican las tarifas de las tasas y precios públicos aplicables en el año 2019. [Internet]. 2019 [cited 2021 Jan 17]. p. 6371–503. Available from: https://www.borm.es

37. Tarifas para facturación de servicios sanitarios y docentes de Osakidetza para el año 2019 [Internet]. 2014 [cited 2021 Jan 17]. Available from: https://www.euskadi.eus/

38. ORDEN de 18 de noviembre de 2015, por la que se modifica la Orden de 14 de octubre de 2005, por la que se fijan los precios públicos de los servicios sanitarios prestados por centros dependientes del Sistema Sanitario Público de Andalucía. BOJA núm.228. [Internet]. Boja. 2015 [cited 2021 Jan 17]. Available from: https://www.juntadeandalucia.es/boja/buscador/

39. Resolución 4B0/38026/2014, de 19 de febrero, del Instituto Social de las Fuerzas Armadas, por la que se regula la asistencia sanitaria fuera del territorio nacional. [Internet]. Boletín Oficial del Estado. 2014 [cited 2021 Jan 17]. Available from: www.boe.es

40. Resolución de 18 de diciembre de 2014, de la Mutualidad General de Funcionarios Civiles del Estado, por la que se publica el concierto suscrito con entidades de seguro para el aseguramiento del acceso a la prestación de asistencia sanitaria en territorio [Internet]. Boletín Oficial del Estado. 2019 [cited 2021 Jan 17]. p. 2260–8. Available from: https://www.boe.es/boe/dias/2019/01/12/pdfs/BOE-A-2019-317.pdf

41. ORDEN SAN/1221/2017, de 21 de julio, por la que se establecen los precios y tarifas máximas aplicables en la prestación de servicios sanitarios con medios ajenos al Sistema de Salud de Aragón. [Internet]. 2017 [cited 2021 Jan 17]. Available from: http://www.boa.aragon.es

42. Convenio singular de vinculación a la Red Hospitalaria Pública del Principado de Asturias, como Hospital de Distrito, suscrito entre el Servicio de Salud del Principado de Asturias y la Fundación Hospital de Jove para la prestación de atención sanitaria [Internet]. 2019 [cited 2021 Jan 17]. Available from: https://sede.asturias.es/servicios-del-bopa

43. Resolución de 29 de marzo de 2017, del Director, por la que se modifica la cuantía de los precios públicos de servicios sanitarios previstos en el Decreto 81/2009, de 16 de junio, por el que se establecen los precios públicos de los servicios sanitarios p [Internet]. 2017 [cited 2021 Jan 17]. Available from: http://www.gobiernodecanarias.org/boc/

44. Orden SAN/35/2017, de 15 de diciembre, por la que se fi jan las cuan- tías de los Precios Públicos de los Servicios Sanitarios prestados por el Servicio Cántabro de Salud. [Internet]. [cited 2021 Jan 17]. Available from: https://boc.cantabria.es/boces/

45. Orden de 17/11/2014, de la Consejería de Sanidad y Asuntos Sociales, por la que se establecen los precios públicos de la asistencia sanitaria y de los servicios prestados en la red de centros sanitarios dependientes del Servicio de Salud de Castilla-La Ma [Internet]. 2008 [cited 2021 Jan 17]. Available from: https://docm.castillalamancha.es/

46. RESOLUCIÓN de 21 de noviembre de 2011, del Presidente de la Gerencia Regional de Salud, por la que se fijan las tarifas máximas y los porcentajes de revisión de las condiciones económicas aplicables en el año 2011, a la prestación de Servicios de Asistenc [Internet]. 2011 [cited 2021 Jan 17]. Available from: https://bocyl.jcyl.es/

47. Monda KL, Joseph PN, Neumann PJ, Bradbury BD, Rubin RJ. Comparative changes in treatment practices and clinical outcomes following implementation of a prospective payment system: the STEPPS study. BMC Nephrol. 2015;16:67.

48. Hornberger J, Hirth RA. Financial implications of choice of dialysis type of the revised Medicare payment system: an economic analysis. Am J Kidney Dis. 2012;60(2):280–7.

49. Robinson B, Fuller D, Zinsser D, Albert J, Gillespie B, Tentori F, et al. The Dialysis Outcomes and Practice Patterns Study (DOPPS) Practice Monitor: rationale and methods for an initiative to monitor the new US bundled dialysis payment system. Am J Kidney Dis. 2011;57(6):822–31.

50. Trivedi AN, Matula S, Miake-Lye I, Glassman PA, Shekelle P, Asch S. Systematic review: comparison of the quality of medical care in Veterans Affairs and non-Veterans Affairs settings. Med Care. 2011;49(1):76–88.

51. O’Hanlon C, Huang C, Sloss E, Anhang Price R, Hussey P, Farmer C, et al. Comparing VA and Non-VA Quality of Care: A Systematic Review. J Gen Intern Med. 2017;32(1):105–21.

52. Muñoz Macías C, Torollo Luna I, Sag Legrán MJ, Salas Cardador F, Gómez López VE, Crespo Montero R. Análisis de los eventos adversos en una unidad de diálisis. Enfermería Nefrológica. 2017;20:29.

53. Arenas Jiménez MD, Ferre G, Álvarez-Ude F. Estrategias para aumentar la seguridad del paciente en hemodiálisis: Aplicación del sistema de análisis modal de fallos y efectos (sistema AMFE). Nefrología. 2017;37(6):608–21.

54. Balhara KS, Kucirka LM, Jaar BG, Segev DL. Disparities in provision of transplant education by profit status of the dialysis center. Am J Transplant. 2012;12(11):3104–10.

55. Pelayo Alonso R. Auto-manejo de la hemodialisis para la enfermedad renal terminal. Vol. 10, Ene. scieloes; 2016. p. 1–4.

56. García-Vallaure Rivas A, Álvarez-Rodriguez AI, Valdés Arias C, Peñas García C, Miguel Montoya M, Velázquez Sánchez P. La satisfacción de los pacientes en una unidad de diálisis concertada. Diferencias con respecto a una unidad hospitalaria pública [Internet]. [cited 2021 Feb 19]. Available from: https://www.revistaseden.org/files/2195_Páginas de 2009-82.pdf

57. Sánchez-Martínez FI, Abellán-Perpiñán JM, Oliva-Moreno J. La privatización de la gestión sanitaria: efecto secundario de la crisis y síntoma de mal gobierno. Informe SESPAS 2014. Gac Sanit. 2014;28:75–80.

58. Špacírová Z, Epstein D, García-Mochón L, Rovira J, Olry de Labry Lima A, Espín J. A general framework for classifying costing methods for economic evaluation of health care. Eur J Heal Econ. 2020;21(4):529–42.

59. Lamas Barreiro JM, Alonso Suárez M, Saavedra Alonso JA, Gándara Martínez A. Costes y valor añadido de los conciertos de hemodiálisis y diálisis peritoneal. Nefrologia. 2011;31(6):656–63.

60. Abdul Manaf MR, Surendra NK, Abdul Gafor AH, Seong Hooi L, Bavanandan S. Dialysis Provision and Implications of Health Economics on Peritoneal Dialysis Utilization: A Review from a Malaysian Perspective. Int J Nephrol. 2017;2017:5819629.

61. Ortiz A, Sanchez-Niño MD, Crespo-Barrio M, De-Sequera-Ortiz P, Fernández-Giráldez E, García-Maset R, et al. The Spanish Society of Nephrology (SENEFRO) commentary to the Spain GBD 2016 report: keeping chronic kidney disease out of sight of health authorities will only magnify the problem. Nefrologia. 2019;39(1):29–34.

62. Yang F, Liao M, Wang P, Yang Z, Liu Y. The Cost-Effectiveness of Kidney Replacement Therapy Modalities: A Systematic Review of Full Economic Evaluations. Appl Health Econ Health Policy. 2021;19(2):163–80.

63. Machowska A, Rutherford P. Peritoneal dialysis use within the context of the population and healthcare systems of Europe - differences, trends and future challenges. Int J Artif Organs. 2016;39(5):211–9.

64. Vargas Marcos F. Documento Marco sobre Enfermedad Renal Crónica dentro de la Estrategia de Abordaje a la Cronicidad en el SNS [Internet]. Ministerio De Sanidad Servicios Sociales e Igualdad. 2015. 54 p. Available from: http://www.senefro.org/modules/news/images/enfermedad_renal_cronica_2015.pdf

65. Tebé Condomí C, Arcos E, Comas J, Espallargues M, Pons JMV, Díaz JM, et al. Atlas de variaciones sistemáticas en el tratamiento sustitutivo renal en Cataluña (2002–2012). Nefrología. 2017;37(2):164–71.

Figura 1. Diagrama de flujo


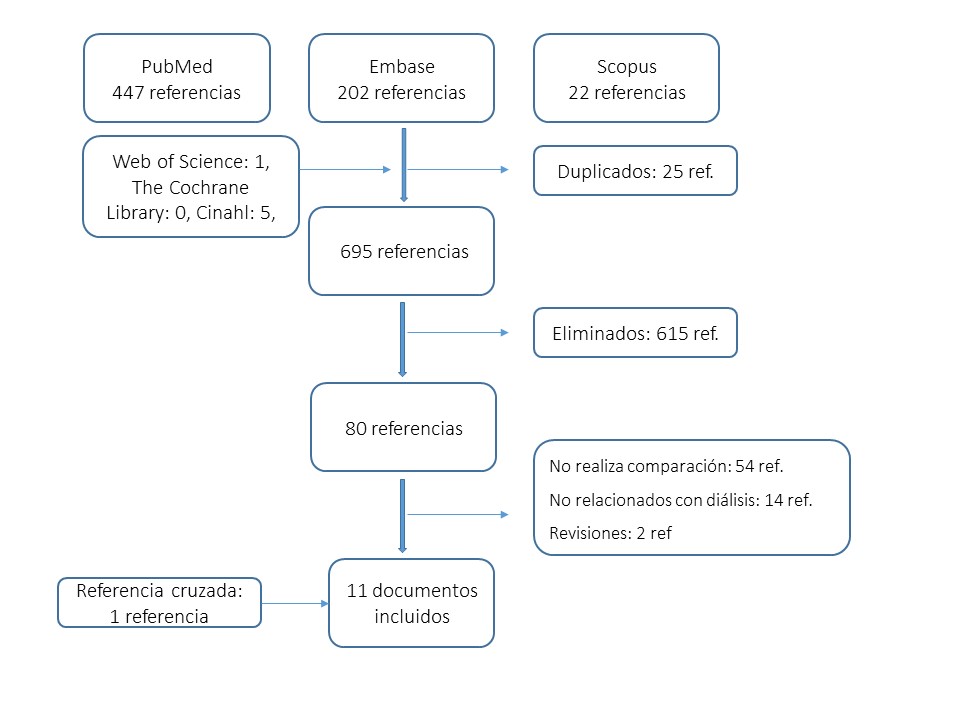


ref: Referencias

Tabla 1. Características de los estudios incluidos.

| Autor | Objetivo | Metodología | Resultados |
| --- | --- | --- | --- |
| Lee (2010)18 | Determinar la asociación entre la finalidad del ánimo de lucro con los días de hospitalización. | Pacientes incluidos en el registro USRDS en diálisis antes del 1 de enero de 2003, sin trasplante previos y asegurados por Medicare. | Incluye 170.130 pacientes en 3443 instalaciones, estando el 9% en instalaciones sin ánimo de lucro. Los pacientes dializados en establecimientos con fines de lucro estuvieron 17,5% más de días hospitalizados (p<0.0001), esta diferencia se mantuvo en el modelo ajusto. |
| Brunelli (2014)20 | Estimar la asociación entre el ánimo de lucro con la mortalidad y hospitalización ajustadas | Aquellos incluidos en el registro USRDS en diálisis durante el 2010, sin trasplante previos y asegurados por Medicare. | Se incluyeron 366.011 y 34.029 pacientes tratados en centros con y sin ánimo de lucro, respectivamente. La tasa cruda de hospitalización fue mayor en la población en centro lucrativos (1,66 hospitalizaciones/paciente-año) que en aquellos no lucrativos (1,59 hospitalizaciones por paciente-año), no siendo significativas en el modelo multivariante (p=0,69). La tasa de mortalidad fue de 23,1 y 22,0 para centros con y sin ánimo de lucro respectivamente, no siendo esta diferencia significativa (p=0.64). |
| Dalrymple (2014)19 | Estudiar la relación entre el ánimo de lucro del centro de diálisis y la tasa de hospitalización. | Pacientes incluidos en el registro USRDS en diálisis entre 2005-2008 asegurados por Medicare. Se excluyeron aquellos trasplantados o recuperaron función renal . | La cohorte incluyó 150.642 pacientes, de ellos 12.985 (9%) recibían sus cuidados en instalaciones sin ánimo de lucro. Las tasas de hospitalización fueron significativamente más altas para los pacientes que recibieron hemodiálisis con fines de lucro 15% (IC95%: 13%-18%) en comparación con los centros de diálisis sin fines de lucro . |
| Fischer (2010)21 | Examinar el efecto del uso exclusivo de servicios de predialisis o no en pacientes ambulatorios. | Cohorte retrospectiva con sujetos que iniciaron la diálisis en 2000 y 2001 y fueron elegibles para la cobertura de veteranos (VA) y Medicare en los 12 meses anteriores al inicio de la diálisis. | Un total de 1.395 recibieron únicamente servicios de VA, mientras que 3.093 usaron los de Medicare y 3.545 utilizaban ambos. Aquellos que usaban ambos servicios mostraron una mayor probabilidad de recibir cuidados de prediálisis (RR: 1,12; IC95%: 1,07-1,17), no existiendo diferencias con los usuarios de ambos servicios (RR: 0,98; IC95%: 0.88-1.08). Igualmente, aquellos de VA (RR, 0,63; IC95%: 0,50-0,81) y de uso doble (RR, 0,78; IC95%: 0,70-0,88) se asociaron con una menor probabilidad de atención nefrológica tardía (<3 meses antes del inicio de la diálisis), comparado con los usuarios únicos de Medicare. |
| Hurst (2010)22 | Evaluar el uso de Fístula arteriovenosa en organizaciones nacionales frente a los VA y el DoD. | Estudio transversal con pacientes que iniciaron diálisis entre 2005 y 2006 e incluidos en la USRDS. | Un total de 129,525 pacientes que tenían Centros de Servicios de Medicare y Medicaid (CMS) disponibles, de ellos 17.110 (13,2%) iniciaron HD con FAV. En cuanto a la atención el 27,2% fue atendido en DoD, 18,5% grupo de empleadores, 16,7% otros seguros, 15,6% Medicare, 13,0% Medicaid y sin seguro 8,2%. Aquellos DoD iniciaron con mayor probabilidad con FAV (OR 1,82; IC95%: 1,67-1,98) y menos con catéter (73,1 vs 80,6%; OR 0,65; IC95%: 0,60-0,71) comparados con el resto. |
| Parikh, (2011)23 | Determinar diferencias de tipos de acceso vascular entre los pacientes según los diferentes sistemas de atención médica VA. | Estudio transversal con pacientes que iniciaron diálisis entre el 1 de junio de 2005 y el 31 de mayo de 2006 2008 incluidos en el registro USRDS | Se incluyeron 378 pacientes de 20 centros VA y 25.534 de 1.631 centros no-VA. Los análisis mostraron que una mayor proporción de pacientes en VA iniciaron diálisis con FAV (20,9% vs 11,6%; OR 1,70; IC95% 1,31–2,20). Esta diferencia significativa desapareció al ajustar por las variables prediálisis (OR 1.28; IC95% 0,98-1,66). |
| Wang, (2013)24 | Evaluó las diferencias en las hospitalizaciones y mortalidad entre los veteranos que reciben diálisis de VA vs no-VA. | Cohorte retrospectiva con sujetos en diálisis entre 2007 y 2008 incluidos en el registro USRDS. Se excluyeron aquellos que fallecieron en los primeros 90 días | Del total de 1.388 veteranos, de ellos el 27% recibió diálisis exclusivamente en VA, el 47% en centros subcontratados y el 25% ambos tipos de centros. El 48% de la muestra fue hospitalizada y un 12% falleció. Aquellos que recibieron diálisis en VA tenían más probabilidades de ser hospitalizados, frente a los usuarios que usaban ambos servicios y los subcontratados (65%, 30% y 63% respectivamente, p <0,001). Entre los ingresados, aquellos VA (22,9 días) la estancia promedio fue mayor que en aquellos que usaban ambos servicios o los (22,4 y 16,6 días, respectivamente), aunque no fueron significativas (p = 0,146). |
| Erickson, (2018)25 | Examinar si la competencia del mercado está asociada con mejores resultados de salud en hemodiálisis. | Pacientes incluidos en el registro USRDS en diálisis entre 2001-2011. Se excluyeron a aquellos pacientes que recibieron diálisis en prisión y en centros militares. | Se incluyeron 632.734 pacientes (1.939.460 paciente-año) recibiendo hemodiálisis en 3.379 áreas sanitarias hospitalarias. Aquellas áreas que al comienzo eran menos competitivas, se volvieron más competitivas al final. La probabilidad anual de mortalidad fue del 20% (rango 21-17), encontrándose una mayor mortalidad en aquellas menos competitivas, aunque no fue significativo. La probabilidad anual de hospitalización fue del 76%, con promedio de 2,7 (ds 3,5) hospitalizaciones/año. Un incremento de 0,2 unidades en IHH se asocia con 2,9 hospitalizaciones (IC95% 0,4-5,4) |
| Artículos sobre costes | | | |
| Conde-Olasagasti(2017)27 | Calcular el coste directo de del tratamiento renal sustitutivo en la provincia de Toledo entre el 2012 y 2013. | Se consideró el consumo de recursos de los pacientes en TRS entre los años 2012 y 2013. Para ello se utilizaron las siguientes fuentes de información: el Registro de Enfermos Renales, gestión económica de los hospitales, farmacia y facturación de los conciertos y trasporte. | En el 2012, se incluyeron 668 pacientes y 682 del 2013. El coste promedio de las diferentes opciones terapéuticas fue: Hemodiálisis hospitalaria 51.228€, 44.814€ la Hemodiálisis concertada, 48.704€ Diálisis peritoneal y 10.946€ el trasplante. El procedimiento de diálisis supone el 53%, 55% y 54% del coste de Hemodiálisis hospitalaria, concertada y diálisis peritoneal respectivamente. |
| Parra- Moncasi (2011)26 | Estimar el coste efectivo del tratamiento sustitutivo de la función renal con HD en la enfermedad renal crónica terminal en diversos centros. | Estudio prospectivo mediante contabilidad analítica que explicita los criterios de imputación. | El coste/paciente/año (excluyendo hospitalización y acceso vascular) de los centros públicos fue de 42.547€ y 39.289€ y para los centros concertados de 32.872€, 29.786€, 35.461€ y 35.294 € (23% superior en los públicos que en los concertados). Los valores más altos de porcentaje sobre el coste total fueron para los públicos 22,4% de fungible, 21,7% personal de enfermería y 11,8% farmacia hospitalaria, mientras que en los centros concertados fueron 16,4% farmacia hospitalaria, 15% fungible y 14,1% para farmacia hospitalaria y personal de enfermería. |
| AETSA (2012)3 | Estimar el coste de las diferentes modalidades de diálisis a partir de datos de centros hospitalarios del Sistema Sanitario Público de Andalucía. | Coste anual según modalidad de diálisis y ámbito asistencial, según la metodología ABC considerando los costes sanitarios totales desde la perspectiva del financiador. El estudio se aplicó a una unidad de gestión clínica intercentros provincial. | El coste total anual del paciente, sin tener en cuenta el seguimiento del paciente, en HD hospitalaria fue de 43.395,40€, frente a 38.815,77€ para la HD concertada. Con un porcentaje de utilización del 47,81% y del 52,19%, respectivamente para la HD hospitalaria y concertada, el coste total anual para el Proceso HD ascendió a 44.778,10 € por paciente (incluido el seguimiento y cifrado en 1.972,77 €/año/paciente). |

HD: Hemodíalisis; USRDS (United States Renal Data System): United States Renal Data System; OR: Odds Ratio; IC95%: Intervalo de confianza al 95%; VA: Departamento de Asuntos de Veteranos; DoD: Departamento de Defensa; FAV: Fístula arteriovenosa; ds: desviación estándar; €: Euros; IHH: índice Hirschman-Herfindahl

Tabla 2. Tarifas públicas de las diferentes Comunidades Autónomas españolas

|  | Descripción | | Tarifa | Mes y año de publicación | Actualización 2020* |
| --- | --- | --- | --- | --- | --- |
| País Vasco37 | Sesión Hemodiálisis | | 271,00€ | Febrero 2019 | 273,98 € |
| Murcia36 | Sesión de Hemodiálisis incluyendo analítica y radiología rutinaria | | 209,67€ | Marzo 2019 | 211,98 € |
| Muface40 | Hemodiálisis en régimen ambulatorio paciente/mes | | 3.610€ | Diciembre 2014 | 3.761,62€ |
| Hemodiálisis en régimen ambulatorio sesión | | 251€ | 261,54€ |
| ISFAS39 | Hemodiálisis en régimen ambulatorio paciente/mes | | 3.610€ | Febrero 2014 | 3.754,40€ |
| Hemodiálisis en régimen ambulatorio sesión | | 251€ | 261,04€ |
| Madrid35 | Hemodiálisis en régimen ambulatorio paciente/mes | | 3.610,00€ | Agosto 2017 | 3.707,47 € |
| Hemodiálisis en régimen ambulatorio sesión | | 278,00€ | 285,51€ |
| Hemodiálisis en centro concertado | | 140,00€ | 143,78€ |
| La Rioja34 | Importe sesión de diálisis | | 393,42€ | Diciembre 2014 | 409,16€ |
| Galicia33 | Por cada sesión en centros hospitalarios tanto a pacientes hospitalizados como en régimen ambulatorio: el precio de la sesión de hemodiálisis comprende analítica rutinaria y las transfusiones que se realicen por indicación médica | | 243,26€ | Abril 2017 | 249,83€ |
| Extremadura32 | Hemodiálisis (sesión) | | 295,80€ | Enero 2019 | 299,05€ |
| Valencia31 | Sesión de hemodiálisis | | 235,17€ | Febrero 2018 | 240,11€ |
| Cataluña30 | Hemodiálisis hospitalaria (ambulatoria) (sesión) | | 176,00€ | Febrero 2013 | 182,86€ |
| Suplemento de hemofiltración en línea (HDF) (sesión) | | 36,00€ | 38,52€ |
| Castilla y León46 | Sesión de hemodiálisis | | 142,21€ | Diciembre 2011 | 151,17€ |
| Club de diálisis (según sesiones de tratamiento | ≤250 sesiones | 160,91€ | 171,05€ |
| 251-390 sesiones | 145,85€ | 155,04€ |
| 391-780 sesiones | 142,51€ | 151,49€ |
| >780 sesiones | 139,21€ | 147,98€ |
| Centro satélite con personal sanitario de SACyL | | 111,47€ | 118,49€ |
| Centro satélite con personal de la empresa concertada | | 130,95€ | 139,20€ |
| En domicilio del paciente | convencional | 136,77€ | 145,39€ |
| diaria corta | 122,68€ | 130,41€ |
| Diálisis domiciliaria con máquina de club de diálisis | convencional | 136,77€ | 145,39€ |
| diaria corta | 122,68€ | 130,41€ |
| Castilla la Mancha45 | Hemodiálisis | | 299,60€ | Noviembre 2014 | 311,58€ |
| Cantabria44 | Hemodiálisis en régimen ambulatorio (sesión). Tratamientos a pacientes con insuficiencia renal crónica sometidos a programas de diálisis en régimen ambulatorio. El precio comprende la analítica y radiología rutinarias, así como las transfusiones necesarias. Se contempla un precio por sesión, que incluirá el coste de la eritropoyetina | | 221,00€ | Diciembre 2017 | 226,97€ |
| Islas Canarias43 | Hemodiálisis Sesión | | 374,33€ | Abril 2017 | 384,44€ |
| Islas Baleares29 | Hemodiálisis | | 262€ | Enero 2018 | 267,50€ |
| Asturias42 | Diálisis Sesión | | 162,69€ | Febrero 2019 | 164,48€ |
| Andalucía38 | Diálisis Sesión | | 132,50€ | Noviembre 2015 | 139,66€ |
| Aragón41 | Hemodiálisis en centros hospitalarios, incluye el coste del concentrado de bicarbonato | | 140,00€ | Agosto 2017 | 143,78€ |
| Hemodiálisis estándar, incluye el coste del concentrado de bicarbonato | | 140,00€ | 143,78€ |
| Hemodiálisis de alto flujo, incluye el coste del concentrado de bicarbonato | | 140,00€ | 143,78€ |
| Hemodiáfiltración OnLine, incluye el coste del concentrado de bicarbonato | | 160,00€ | 164,32€ |
| Hemodiálisis a domicilio con máquina (se incluyen: material de hemodiálisis, líquido de diálisis, monitores de diálisis y material de reanimación cardiopulmonar propio) | | 137,90€ | 141,62€ |
| Ceuta y Melilla28 | Hemodiálisis | | 257,66€ | Julio 2013 | 268,48€ |

*El precio de las tarifas públicas fueron actualizadas al enero del año 2020 según el Índice de Precios al Consumo, disponible en https://www.ine.es/calcula/.

Muface: La Mutualidad General de Funcionarios Civiles del Estado de España.

ISFAS: Instituto Social de las Fuerzas Armadas

**Anexo 1**: Etapas de investigación y métodos para la revisión de alcance.

| **Paso** | **Actividades** | **Autor responsable** |
| --- | --- | --- |
| 1. Determinación de la pregunta | Se celebraron varias reuniones para consensuar el objetivo y las definiciones de la revisión. Se realizaron varias consultas bibliográficas para la identificaron de términos clave. Teniendo en cuenta los resultados de búsqueda y los objetivos del estudio, se decidió que el método más apropiado para la síntesis de la evidencia era la revisión de alcance. | AOL, MPV y personal independiente* |
| 1. Identificación de estudios relevantes. | Los criterios de inclusión y exclusión se desarrollaron y revisaron de forma iterativa. La búsqueda de literatura se complementó con otras bases de datos y literatura gris, y se gestionó con gestor documental Mendeley. | AOL, ACM y MdAGV |
| 1. Selección de estudios. | Los títulos y los resúmenes se revisaron de forma independiente, teniendo en cuenta los criterios de inclusión y exclusión predeterminados. Luego, se revisó el texto completo de los artículos que eran relevantes para cumplir los objetivos, y cualquier desacuerdo se resolvió mediante consenso. | AOL, MdAGV y MCVC |
| 1. Extracción de información y resultados de redacción. | La extracción de información se realizó por consenso. Luego, una persona independiente verificó que la información extraída fuera completa y precisa. La información en los estudios identificados se categorizó, y posteriormente se redactó el documento. | AOL, ACM y MdAGV |
| 1. Participación de las partes interesadas. | Los resultados de esta revisión forman parte de un proyecto más amplio que se lleva a cabo para establecer criterios para la evaluación de la diálisis concertada mediante un análisis de decisión multicriterio. Destacar que se realizará al menos una presentación a diferentes partes interesadas (tanto profesionales sanitarios como a los responsables políticos y pacientes) que permitirán recoger . | Todo el equipo |

* La estrategia de búsqueda fue verificada por una bibliotecaria con amplia experiencia en el ámbito de la salud pública (Camila Higueras Callejón).
